# Supplementary material for: RNase A Promotes Proliferation of Neuronal Progenitor Cells via an ERK-Dependent Pathway
Source: PubMed Central journal article supplement (PMC6275325; doi:10.3389/fnmol.2018.00428), 2018-11-26
Supplement: Data_Sheet_1.pdf [file Data_Sheet_1.pdf]

## Supplementary Information

### **RNase A promotes proliferation of neuronal progenitor cells via an ERK-dependent pathway**

Hsin-Yu Liu, Chiung-Ya Chen, Yun-Fen Hung, Hong-Ru Lin, Hsu-Wen Chao, Pu-Yun Shih,  
Chi-Ning Chuang, Wei-Ping Li, Tzyy-Nan Huang and Yi-Ping Hsueh

Institute of Molecular Biology, Academia Sinica, Taipei, 11529, Taiwan

**Context: 1 Supplementary Movie, 4 Supplementary Figures, 1 Supplementary Table**

**Movie S1. Dividing cells are present in neuronal culture (related to Figure 2B).** Time-lapse recording of neuronal culture was conducted from DIV 0 to 4. Red arrowhead points to a cell aggregate containing NPCs, which were actively dividing during recording.

**Figure S1. AKT is not activated by RNase A treatment.**

**Figure S2. Step-by-step elucidation of quantification of EdU<sup>+</sup> cell density in brain.**

**Figure S3. Step-by-step elucidation of quantification of EdU<sup>+</sup> cell density in hippocampus.**

**Figure S4. BrdU and Iba1 double-staining after *in vivo* administration of RNase A (related to Figure 9).**

**Table S1. Antibody information.**

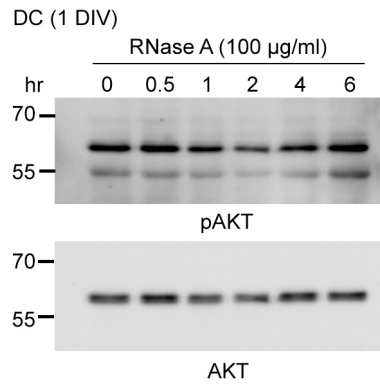

**Supplementary Figure S1. AKT is not activated by RNase A treatment.** Cortex and hippocampus dissociated cultures (DC) were treated with RNase A (100 µg/ml) at 1 DIV for different time periods, as indicated, and harvested for immunoblotting with phospho-AKT (Thr308) and pan-AKT antibodies. Unlike ERK (shown in Figure 8), no obvious AKT phosphorylation was found upon RNase A treatment.

**A** Convert image to 8-bit in ImageJ

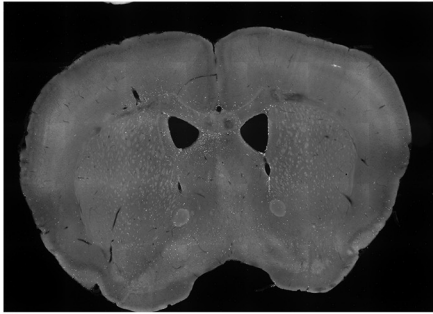

**B** Go to "Image", click "threshold" under "Adjust", choose "Moments", "B&W" and "Dark background", set the threshold range using the slider bars.

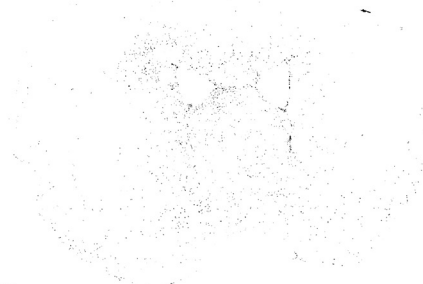

**C** Go to "Analyze", click "Analyze Particles" with the setting of 30-infinity pixel units and 0.01-1.00 circularity

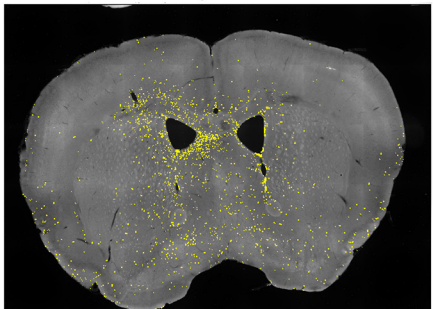

**D** Determine area of each particle

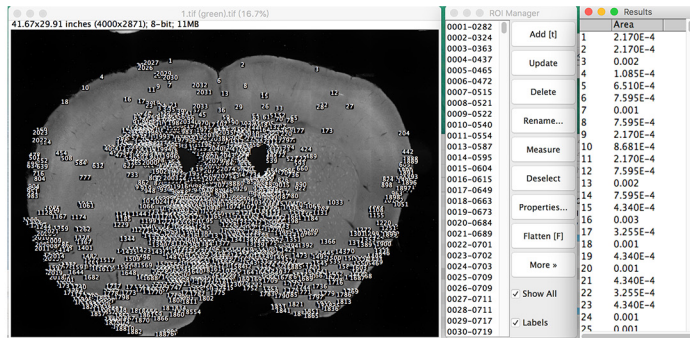

**E** Outline brain to get total area

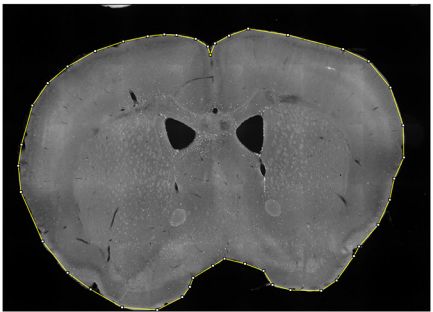

**F** Subtract areas of lateral ventricles and artifact

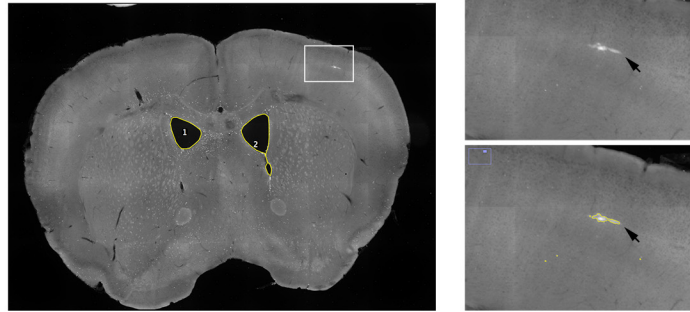

**Supplementary Figure S2. Step-by-step elucidation of quantification of EdU<sup>+</sup> cell density in brain.** (A) Images were converted into 8-bit. (B) Images were adjusted with a threshold ("Moments" and "B&W" modes in "Dark background") using ImageJ software. (C) The area of fluorescence reactivity was analyzed using "Analyze Particles" with the setting of 30-infinity pixel units and 0.01-1.00 circularity. (D) The area of each particle was determined. (E) The brain was outlined to get total area. (F) Areas of lateral ventricles and artifacts (arrow as an example) were further subtracted.

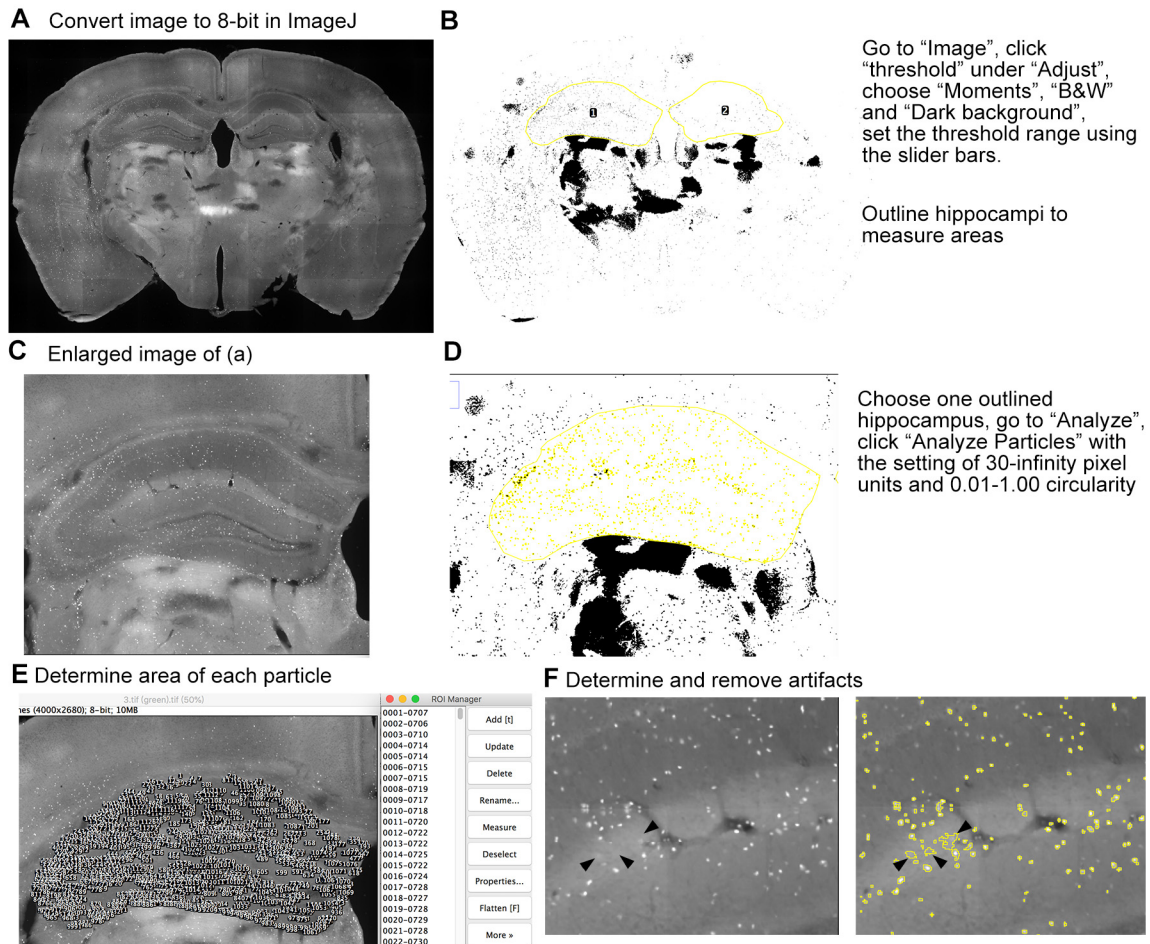

**Supplementary Figure S3. Step-by-step elucidation of quantification of EdU<sup>+</sup> cell density in hippocampus.** (A) Images were converted into 8-bit. (B) Images were adjusted with a threshold ("Moments" and "B&W" modes in "Dark background") using ImageJ software. Outline hippocampus to get areas. (C) Enlarged image of left side of hippocampus. (D) The area of fluorescence reactivity was analyzed using "Analyze Particles" with the setting of 30-infinity pixel units and 0.01-1.00 circularity. (E) The number and area of each particle was determined. (F) The quantitative results were manually corrected to remove artifacts (arrowheads as examples).

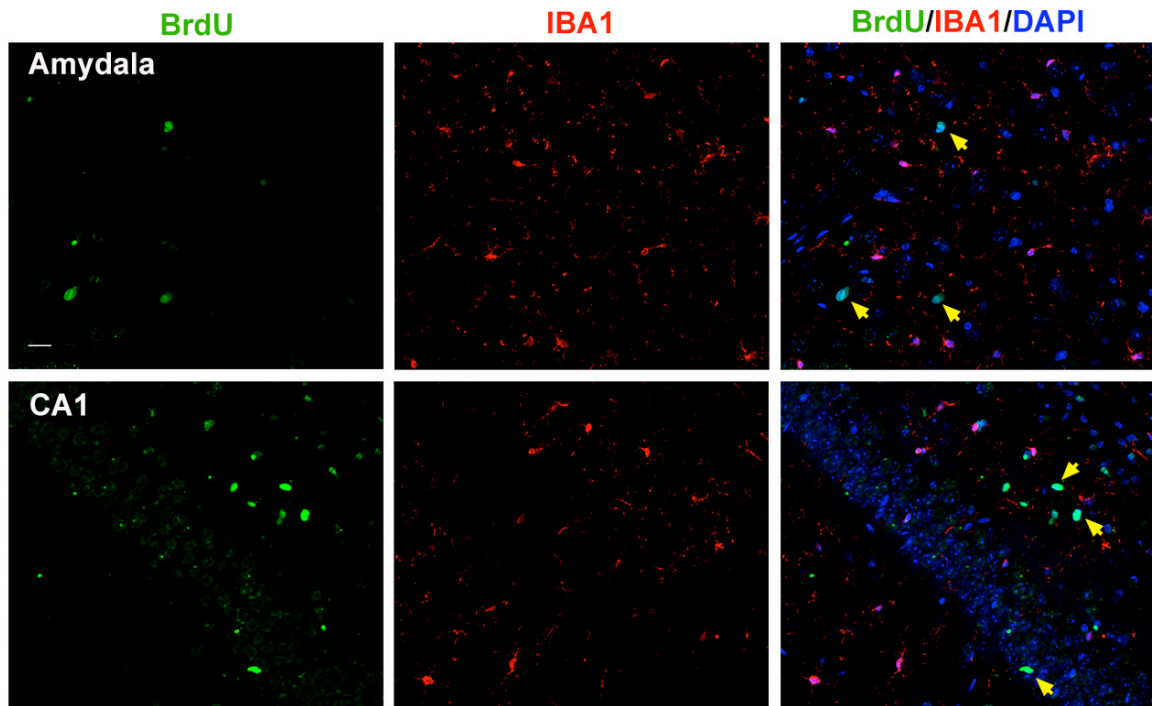

**Supplementary Figure S4. BrdU and Iba1 double-staining after *in vivo* administration of RNase A (related to Figure 9).** Iba1-positive microglial cells were not labeled by BrdU after RNase A treatment *in vivo*. Yellow arrows indicate some BrdU-single-positive cells. Scale bar, 20  $\mu\text{m}$ .

**Supplementary Table 1. Summary of primary antibodies**

| <b>Antigen</b> | <b>Host species</b> | <b>Source</b>                                    | <b>Working concentration</b> |
|----------------|---------------------|--------------------------------------------------|------------------------------|
| MAP2           | Rabbit              | Millipore                                        | ICC 1:500                    |
| Nestin         | Mouse               | Millipore, MAB353                                | ICC 1:500                    |
|                |                     |                                                  | IHC 1:250                    |
| BrdU           | Rat                 | Abcam, ab6326                                    | ICC 1:500                    |
|                |                     |                                                  | IHC 1:200                    |
| SOX2           | Rabbit              | Abcam, ab97959                                   | ICC 1:500                    |
| GFAP           | Mouse               | Chemicon, MAB3402                                | ICC 1:500 (1 µg/ml)          |
| IBA1           | Rabbit              | Wako, 019-19741                                  | ICC 1:500 (0.5 µg/ml)        |
| p-ERK1/2       | Rabbit              | Cell signaling (20G11)<br>(Thr202/tyr204), #4376 | WB 1:1000                    |
| ERK (pan)      | Rabbit              | Cell signaling, #4695                            | WB 1:1000                    |
| p-AKT (Thr308) | Rabbit              | Cell signaling, #9275                            | WB 1:1000                    |
| AKT (pan)      | Rabbit              | Cell signaling, #4691S                           | WB 1:1000                    |
| VCP            | Mouse               | BD, 612183                                       | WB 1:1000                    |
